# Supplementary material for: Revisiting the behaviour of BiVO4as a carbon dioxide reduction photo-catalyst
Source: Royal Society of Chemistry journal article supplement (doi:10.1039/c7dt00414a), 2017-01-01
Supplement: c7dt00414a1.pdf [file c7dt00414a1.pdf]

## Supplementary Information

### **Vanadium-spiked BiVO<sub>4</sub> photoreduction of CO<sub>2</sub>**

To test the effect of vanadium in the stabilization and activation of BiVO<sub>4</sub>, soluble vanadium species were added to the photochemical reaction solution. First, pristine *hyp*-BiVO<sub>4</sub> was added to a solution of vanadium oxides obtained from the filtrate of a previous *hyp*-BiVO<sub>4</sub> reaction. Second, pristine *hyp*-BiVO<sub>4</sub> was added to a solution of 15 mM NH<sub>4</sub>VO<sub>3</sub> with 1M NaOH. Both solutions were degassed and filled with CO<sub>2</sub> followed by illumination, although neither was capable of CO<sub>2</sub> reduction.

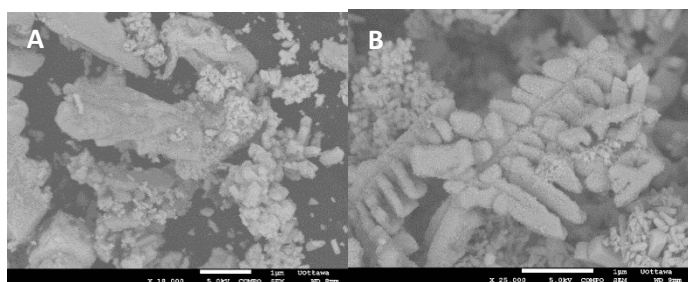

**SI Figure 1.** Comparison of post-reaction SEM images for *hyp*-BiVO<sub>4</sub> reactions spiked with a) ammonium vanadate and b) vanadium filtrate from previous reaction.

After filtration and drying the post-reaction catalysts, the ammonium vanadate doped catalyst exhibited a color change to tan, in contrast to the yellow of pristine *hyp*-BiVO<sub>4</sub>, and the catalysts reacted in the presence of the vanadium filtrate. Both the structure and morphology of BiVO<sub>4</sub> was modified in two different ways, as shown in Figures 1 and 2.

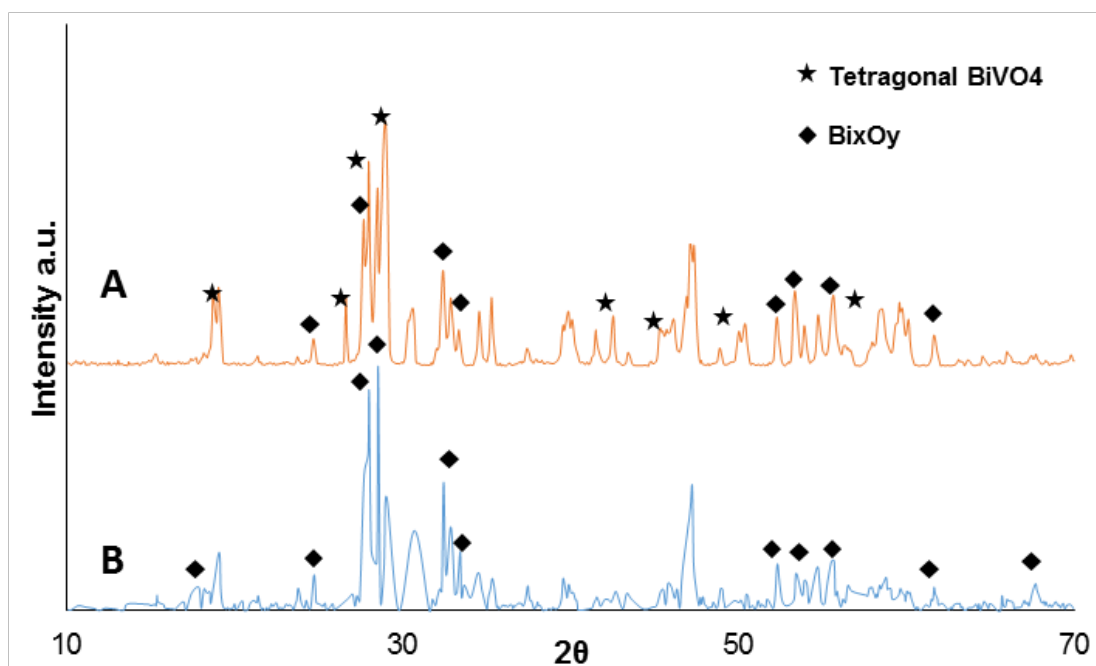

**SI Figure 2.** Comparison of post-reaction powder XRD patterns for *hyp*-BiVO<sub>4</sub> reactions spiked with a) ammonium vanadate and b) vanadium filtrate from previous reaction.

To confirm the EDS measurements, XRF data were obtained on the BiVO<sub>4</sub> polyhedra before and after catalytic testing

| Sample                           | Bi mass % | V mass % | O mass %<br>(balance) | Change in V<br>(mass %) |
|----------------------------------|-----------|----------|-----------------------|-------------------------|
| BiVO <sub>4</sub> before testing | 50.26     | 14.47    | 35.27                 | -                       |
| BiVO <sub>4</sub> after testing  | 57.35     | 14.20    | 28.45                 | 0.27                    |

**SI Figure 3.** Comparison of XRF data of as-synthesized and post-reaction polyhedral BiVO<sub>4</sub>
